# Supplementary material
Source: HighWire-hosted journal article supplement (https://bmjopen.bmj.com/content/8/11/e021573)

**Supplementary Figure 1: Time taken for complaint to be fully resolved (n = 44)**

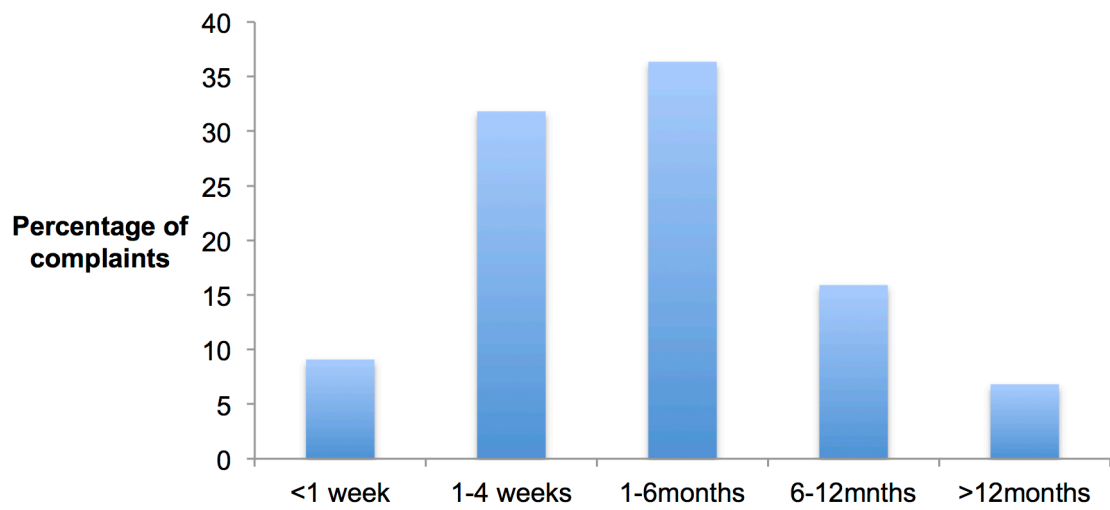

Supplement: inline-supplementary-material-4 [file inline-supplementary-material-4.pdf]

**Supplementary Figure 2: Nature of effect on emotional wellbeing (n = 48)**

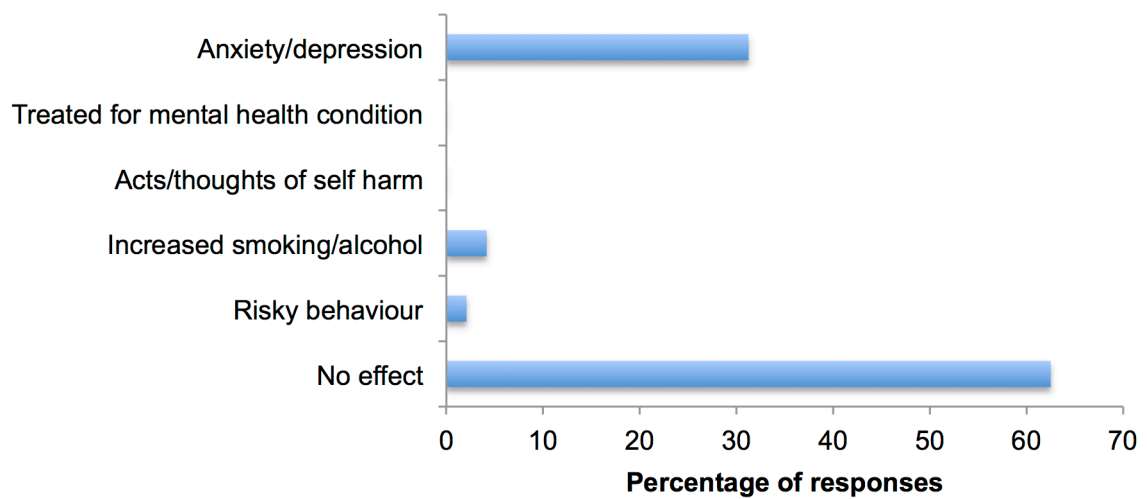

Supplement: inline-supplementary-material-5 [file inline-supplementary-material-5.pdf]

**Supplementary Figure 3: Severity of effect on emotional wellbeing (n = 47)**

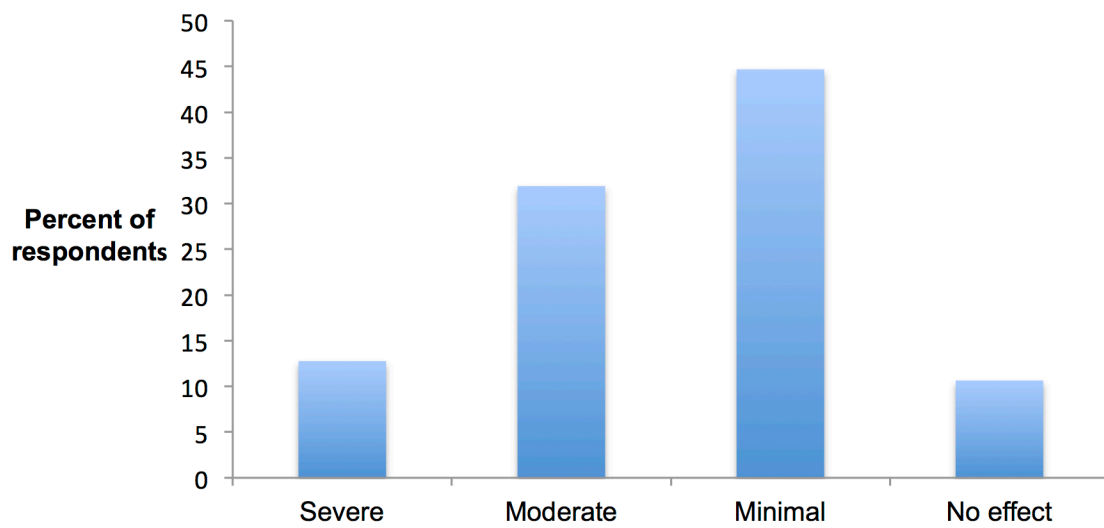

Supplement: inline-supplementary-material-6 [file inline-supplementary-material-6.pdf]
